# Supplementary material
Source: PubMed Central journal article supplement (PMC4423075)
Supplement: cr201534x1.pdf [file cr201534x1.pdf]

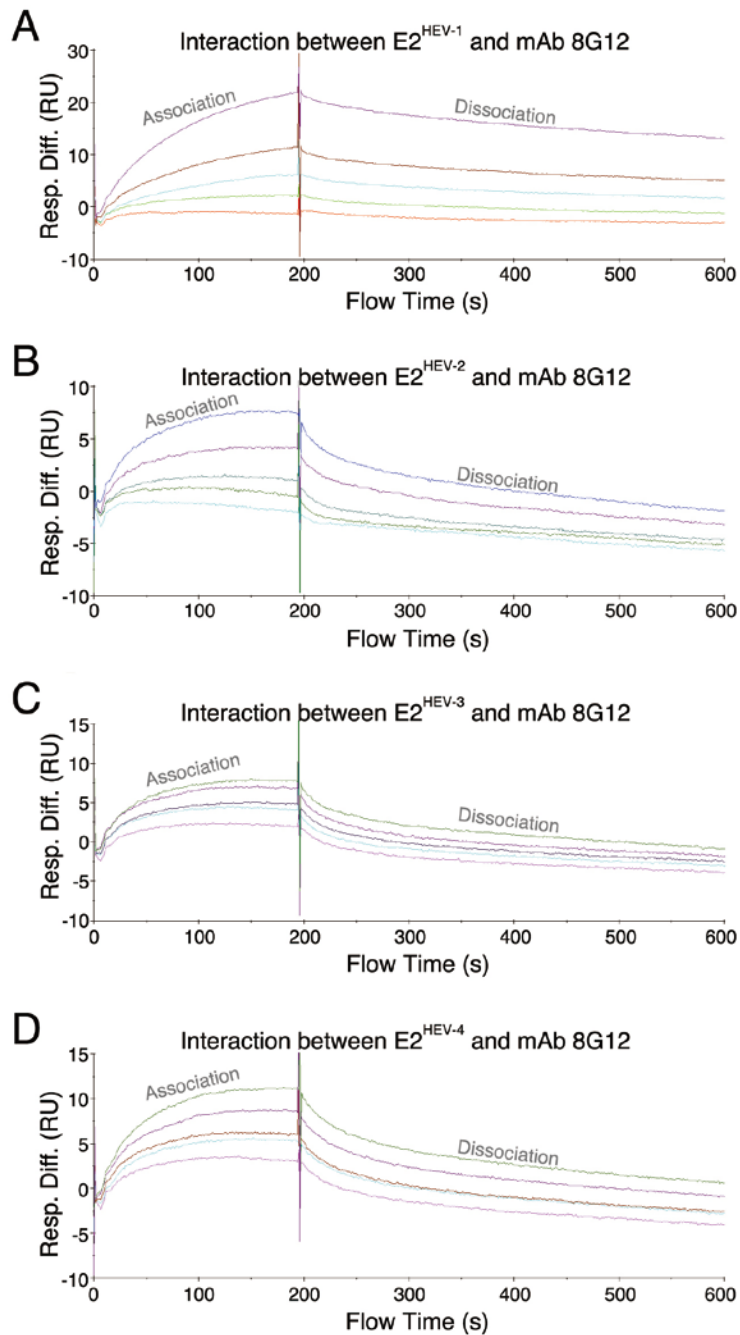

**Supplementary information, Figure S1** E2 and mAb 8G12 binding curves in Surface Plasma Resonance (SPR). Total 5 concentrations of E2 in serial dilution were injected to mAb 8G12-bound chip. These binding curves were used to calculate the affinity constants. The experiments were repeated twice and the results are consistent.
