# Supplementary material
Source: PubMed Central journal article supplement (PMC4423075)
Supplement: cr201534x2.pdf [file cr201534x2.pdf]

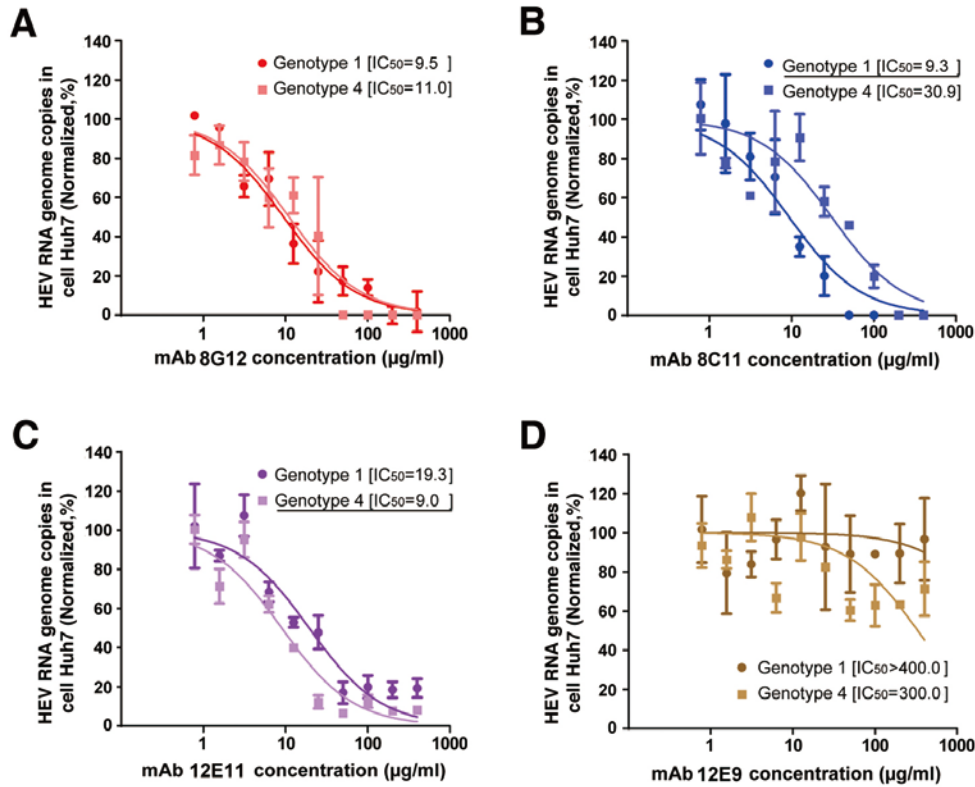

**Supplementary information, Figure S2** Inhibition profiles of mAb 8G12, 8C11, 12E11 and 12E9 blocking authentic HEV from infecting the host cell. HEV genotype 1 or genotype 4 of  $1 \times 10^5$  genomic RNA copies was subjected to infect vulnerable Huh7 cells in the pretreatment of serial dilutions of mAb. The mixture was incubated at 37 °C for 60 min, and then washed three times with PBS. The cells were harvested and then tested for the HEV RNA contents. The RNA contents of cultures infected with the mAb treated virus were expressed as percentage of that in the control cultures infected with untreated virus. The inhibition profiles of HEV RNA genome copies vs. concentration of mAb 8G12 were fitted to a sigmoid trend to generate the  $IC_{50}$  value. (A)  $IC_{50}$  of 8G12, genotype 1 = 9.5  $\mu\text{g/ml}$  [95%CI: 6.7~13.4], genotype 4 = 11.0  $\mu\text{g/ml}$  [95%CI: 6.8~17.9], indicating that mAb 8G12 equally neutralizes HEV genotype 1 and 4 (B)  $IC_{50}$  of 8C11, genotype 1 = 9.3  $\mu\text{g/ml}$  [95%CI: 5.7~15.1], genotype 4 = 30.9  $\mu\text{g/ml}$  [95%CI: 17.7~53.7], showing mAb 8C11 prefers genotype 1 over genotype 4, which has been elucidated as discriminating the genotypes 1 and 4 based on the aa in position 497 in our previous study [17]. (C)  $IC_{50}$  of 12E11, genotype 1 = 19.3  $\mu\text{g/ml}$  [95%CI: 12.6~29.6], genotype 4 = 9.0  $\mu\text{g/ml}$  [95%CI: 6.3~12.8], showing mAb 12E11 prefers genotype 4 over genotype 1 (will be published elsewhere). (D)  $IC_{50}$  of 12E9, genotype 1 > 400  $\mu\text{g/ml}$ , genotype 4 = 300  $\mu\text{g/ml}$ , demonstrating negative neutralizing activity against either genotype.
