# Supplementary material
Source: PubMed Central journal article supplement (PMC4423075)
Supplement: cr201534x3.pdf [file cr201534x3.pdf]

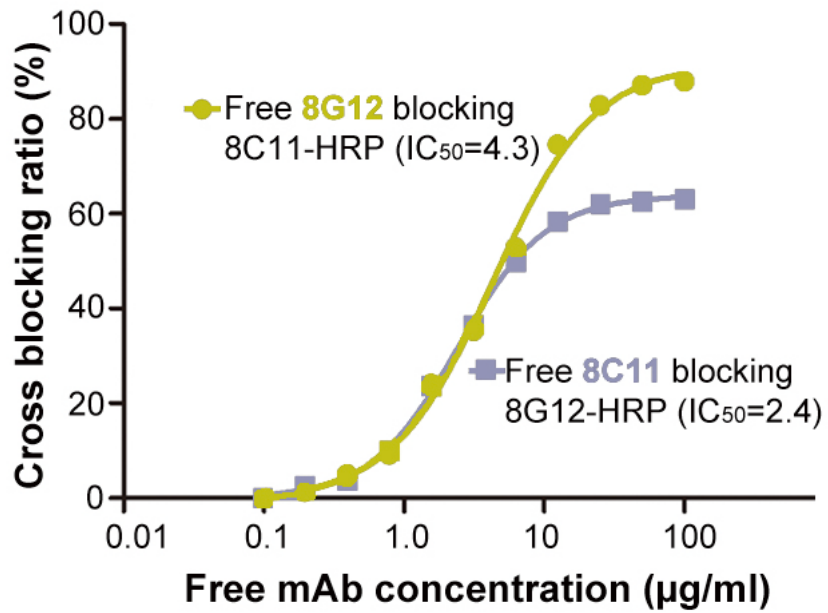

**Supplementary information, Figure S3** Cross blocking of mAbs 8G12 and 8C11 against p239 VLP (genotype 1). Overloaded free mAb 8G12 blocked HRP-8C11 against p239 VLP with a high blocking ratio of about 90%, while overloaded free mAb 8C11 blocked HRP-8G12 against p239 VLP with about 60%.
