# Supplementary material
Source: PubMed Central journal article supplement (PMC4423075)
Supplement: cr201534x4.pdf [file cr201534x4.pdf]

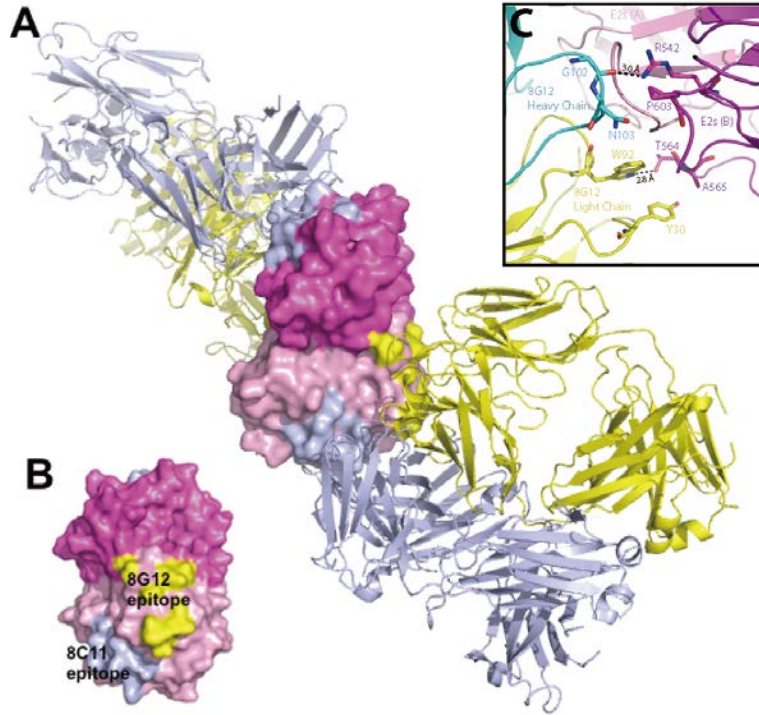

**Supplementary information, Figure S4** Cross-genotype neutralizing mAb 8G12 binds to the E2s dimeric interface region. This site is different from the genotype-1 preferred antibody 8C11, which recognizes the groove region of E2s. **(A)** Comparison of the binding sites of broadly neutralizing antibody 8G12 Fab (yellow) and genotype-1 preferred antibody 8C11 Fab (light blue). The E2s dimer is shown in a surface representation (magenta). **(B)** The two epitopes are shown in a close-up view. **(C)** The intermolecular interactions between 8G12 and one monomer of E2s dimer which has fewer interactions than the other monomer of the dimeric E2s. 8G12 heavy chain is colored as cyan while light chain in yellow. The interacting residues side chains are shown as stick model.
