# Supplementary material
Source: PubMed Central journal article supplement (PMC4423075)
Supplement: cr201534x5.pdf [file cr201534x5.pdf]

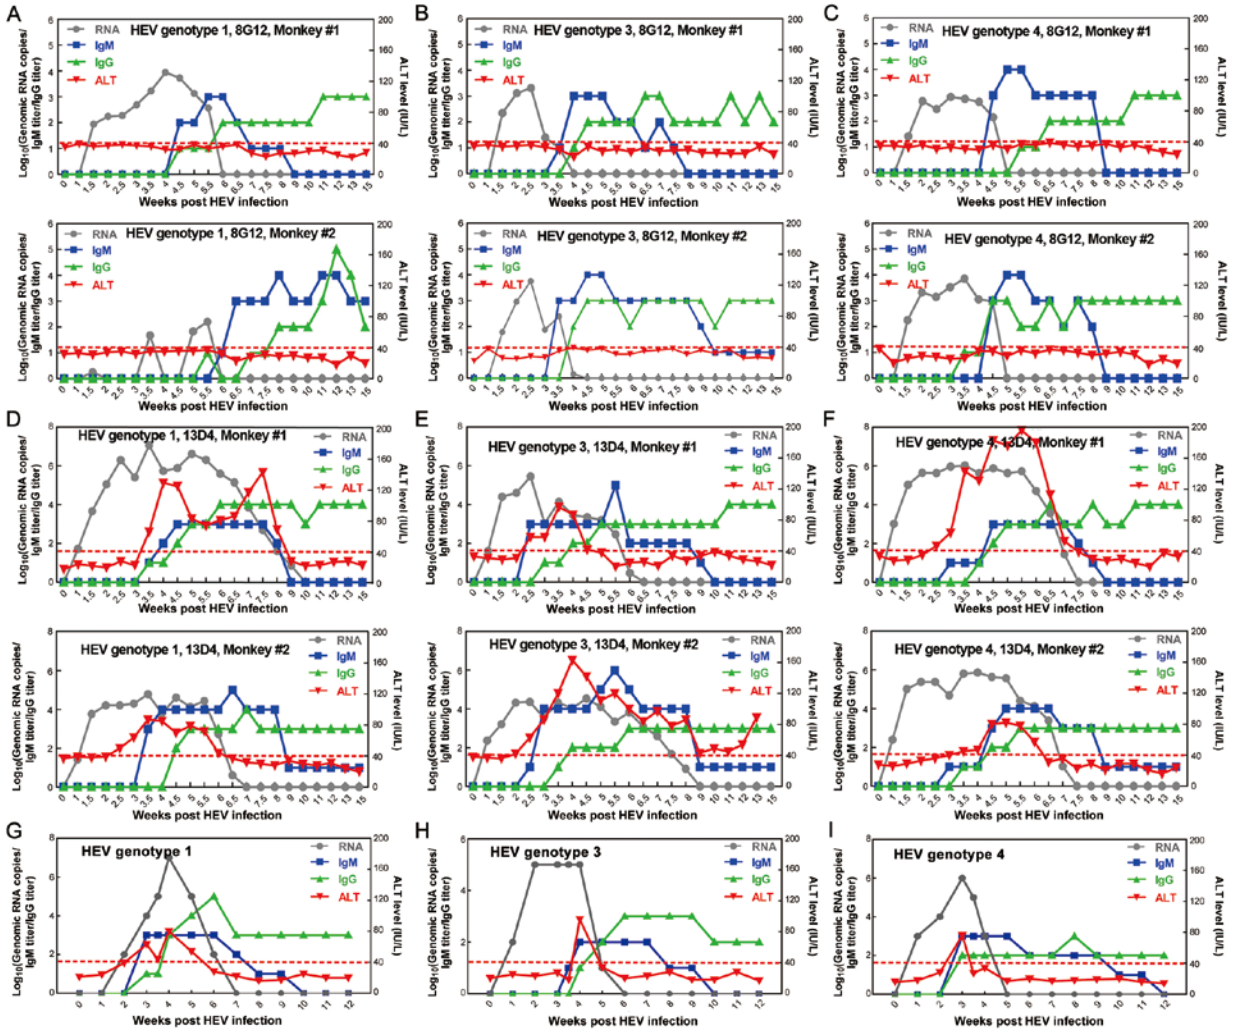

**Supplementary information, Figure S5** Neutralization of HEV infection rates by mAb 8G12 in Macacus rhesus monkey model. The reaction to the challenge of  $5.55 \times 10^7$ ,  $2.69 \times 10^7$ ,  $4.73 \times 10^7$  genomic RNA copies of HEV genotype 1, 3 or 4, respectively, pretreated with mAb 8G12 (**A**, **B**, **C**) and mAb 13D4 as a control (**D**, **E**, **F**). The reaction to the challenge of HEV infection of  $5.55 \times 10^5$ ,  $2.69 \times 10^5$ ,  $4.73 \times 10^5$  genomic RNA copies of HEV genotype 1, 3 or 4, respectively, (**G**, **H**, **I**) to determine the Hepatitis E-causative virus titer and to measure the blocking rate of mAb 8G12 against sera. The variation of HEV RNA genome copies was shown in gray circles and line; IgM titer in blue squares and line; IgG titer in green triangles and line; ALT level in red triangles and line. Elevated ALT > 40IU/L (dotted red line) was considered to be diagnostic of hepatitis [21]. More details were provided in Figure 1E.
