# Supplementary material
Source: PubMed Central journal article supplement (PMC4423075)
Supplement: cr201534x6.pdf [file cr201534x6.pdf]

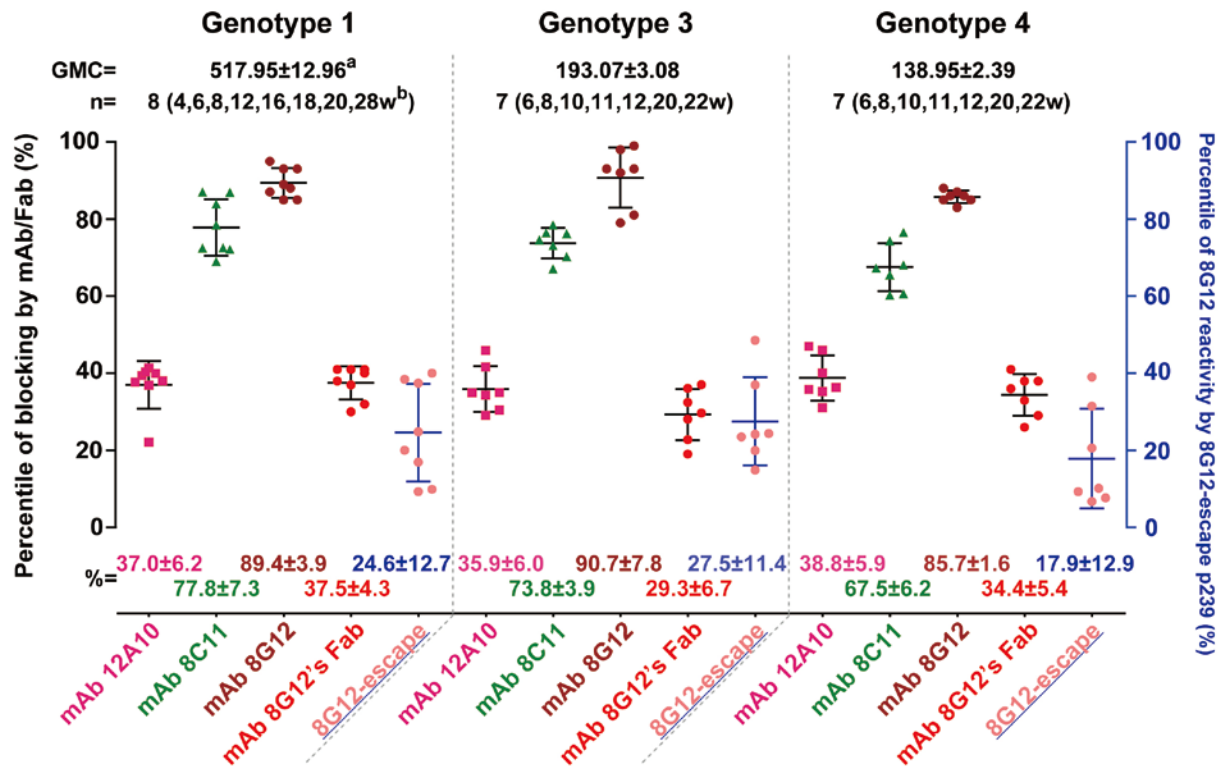

**Supplementary information, Figure S6** Comparison of the blocking ratio of mAb 12A10, 8C11 and 8G12 against monkey sera. Serial sera of three monkeys challenged with HEV genotype 1, 3 and 4 were subjected to blocking test by mAb 12A10, 8C11, 8G12 and 8G12 Fab, associated to the left perpendicular axial. The respective serum was pre-tested to determine dilution times to yield OD value of 1.0. Blocking activity of the mAb against each serum sample (dots) was calculated as  $(1 - (\text{OD value of sera treated with mAb} / \text{OD value of the concurrent untreated control})) \times 100\%$ . The 8G12's epitope reactivity with minimum spatial occlusion was measured by 8G12-escape p239 mutant, associated to the right axial colored in blue. The percentile of 8G12's epitope reactivity by 8G12-escape p239 mutant was calculated by the increased  $EC_{50}$  compared with wild-type p239, i.e.  $\% \text{ 8G12 reactivity} = (1 - EC_{50[\text{wild-type}]} / EC_{50[\text{8G12-escape}]}) \times 100\%$ . The horizontal and vertical lines indicate the median and interquartile blocking activity against the different samples. Note: <sup>a</sup>, anti-HEV IgG titer of the monkey sera was defined by maximum dilution titer to make detectability in IgG kit, GMC was denoted as geometric mean dilution titer of all the grouped samples with standard deviation; <sup>b</sup>, weeks post the challenge with HEV in monkeys.
