# Supplementary material
Source: PubMed Central journal article supplement (PMC4423075)
Supplement: cr201534x7.pdf [file cr201534x7.pdf]

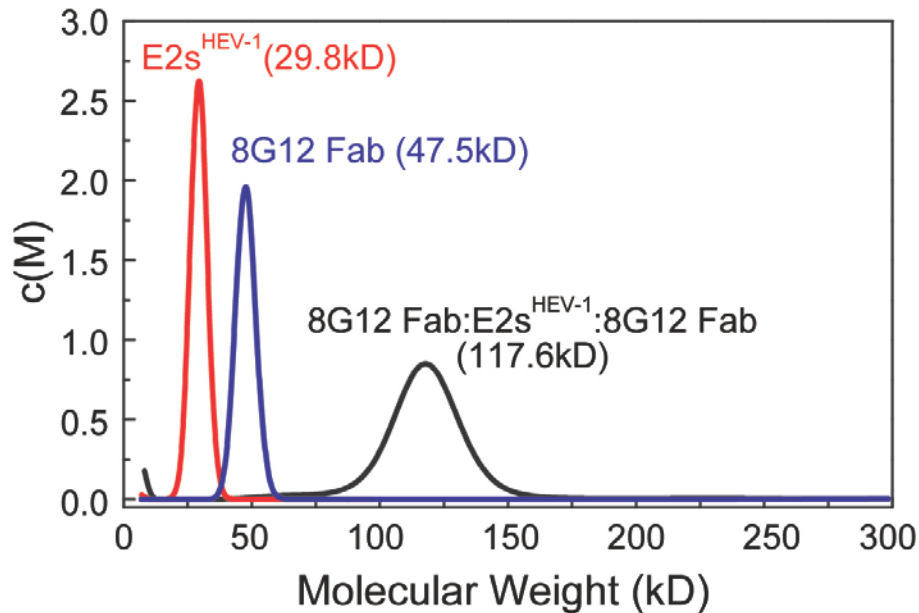

**Supplementary information, Figure S7** Stoichiometry of E2s<sup>HEV-4</sup>:8G12 complex in solution. The apparent molecular weights of E2s<sup>HEV-4</sup>, 8G12 Fab, and their complex were measured by  $c(s)$  fitting in sedimentation velocity (SV) by analytical ultra-centrifugation. The  $c(M)$  profile of E2s<sup>HEV-4</sup> and 8G12 Fab alone is denoted as red and blue lines, respectively. The  $c(M)$  distribution for E2s<sup>HEV-4</sup>:8G12 complex is highlighted in a black line. E2s<sup>HEV-4</sup> exists as a dimer of 29.8 kDa, and 8G12 Fab is monomeric as 47.5 kDa. The E2s<sup>HEV-4</sup>:8G12 complex exists in immune assembly with molecular weight of 117.6 kDa, indicating one E2s<sup>HEV-4</sup> dimer binds to two 8G12 Fab, as observed in the crystal structure.
