# Supplementary material
Source: PubMed Central journal article supplement (PMC4423075)
Supplement: cr201534x9.pdf [file cr201534x9.pdf]

**A**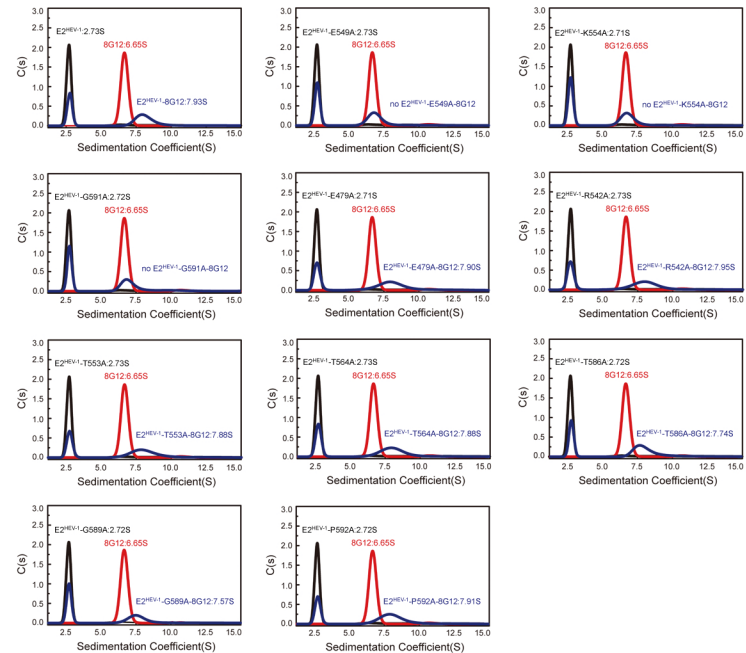**B**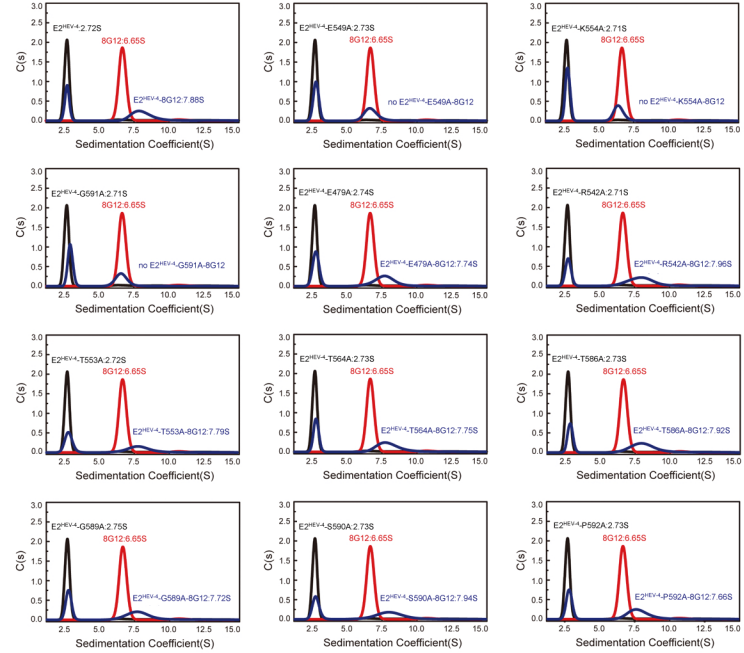

**Supplementary information, Figure S9** SV binding test of the E2<sup>HEV-1</sup> and E2<sup>HEV-4</sup> constructs via Ala-scanning mutagenesis on the 8G12 binding interface. **(A)** E2 and its mutants of HEV genotype 1. **(B)** E2 and its mutants of HEV genotype 4. The c(s) profile of E2 or its mutants are denoted as a black curve, with mAb 8G12 in red. The profile of the antigen: antibody mixtures are shown in blue line. More details were provided in Figure 5C and 5D. The binding results are consistent with the western blotting data shown in Figure 5A and 5B.
