# Supplementary material
Source: PubMed Central journal article supplement (PMC4423075)
Supplement: cr201534x10.pdf [file cr201534x10.pdf]

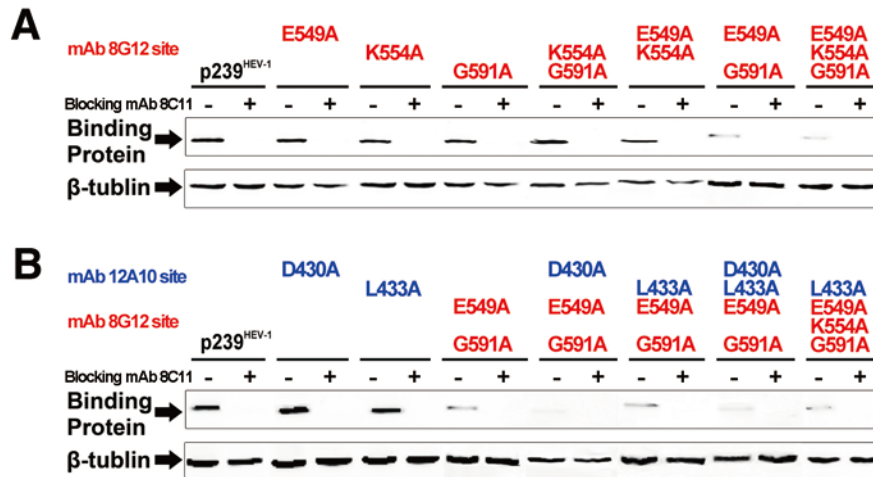

**Supplementary information, Figure S10** Binding of p239 and its mutants disturbing mAb 8G12 and 12A10 binding sites in Huh7 cells was detected by western blotting. The endogenous levels of β-tubulin serve as a loading control for equal loading. More details were provided in Figure 6F.
