# Supplementary material
Source: PubMed Central journal article supplement (PMC4423075)
Supplement: cr201534x11.pdf [file cr201534x11.pdf]

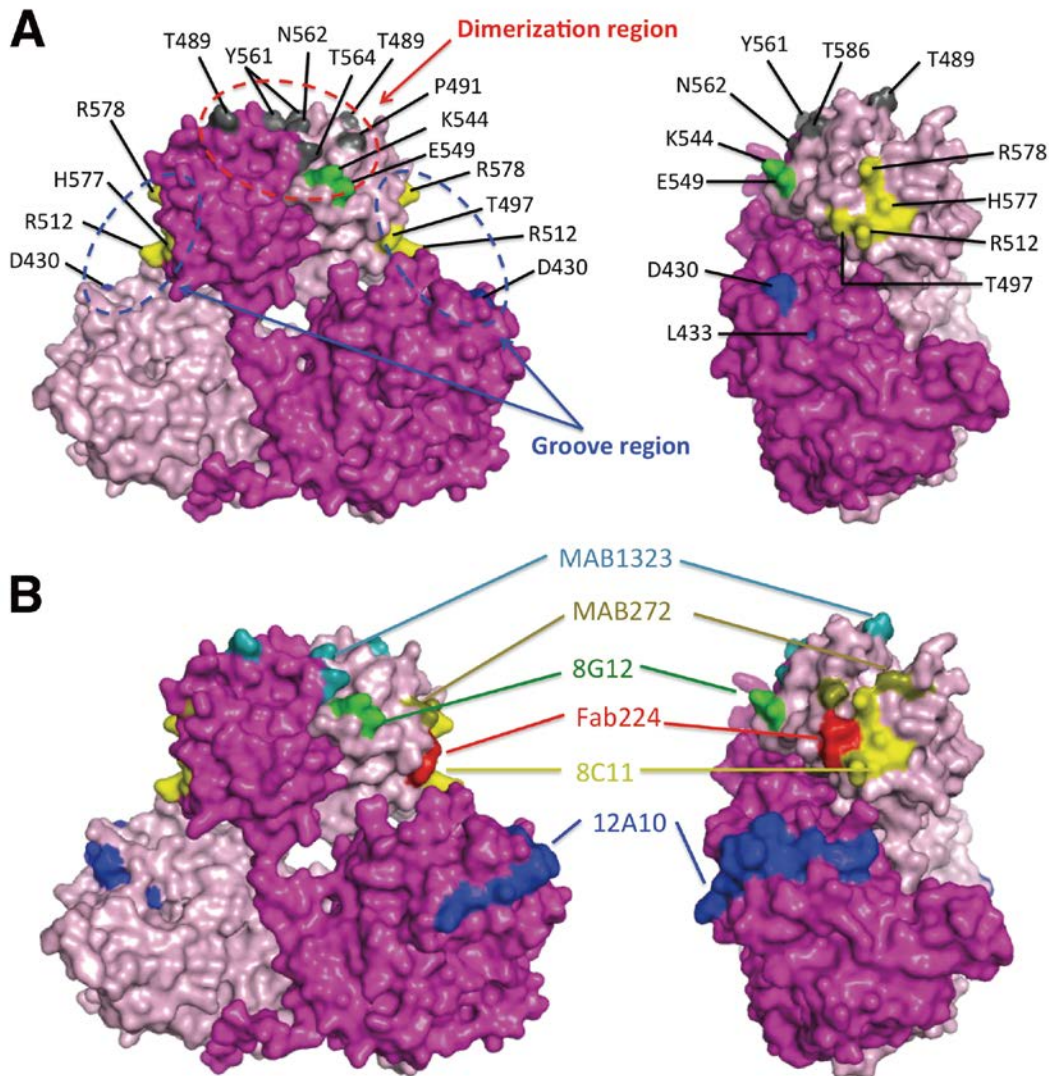

**Supplementary information, Figure S11** The potential virus-host binding region. **(A)** The key residues in HEV VLP genotype 4 (PDB code 3HAG) responsible for binding to Huh7 cells are shown in front view and side view. The sites from the epitopes region of 8C11, 8G12, 12A10 are labeled and colored in yellow, green and blue respectively. The amino acids in VLP responsible for binding to Huh7 cells reported by Yamashita *et al* [9] are labeled and colored in grey. **(B)** The epitopes of known neutralizing antibody that involved in the antibody recognition are shown in HEV VLP genotype 4 in two orientations. For better illustration of those epitopes, the epitopes of mAb 8H3 and the linear epitopes of mAbs HEV#4 and HEV#31 are not shown, as the sites are overlapped with other epitopes.
