# Supplementary material
Source: PubMed Central journal article supplement (PMC4423075)
Supplement: cr201534x12.pdf [file cr201534x12.pdf]

**Table S1.** Hydrogen bonding contacts ( $\leq 3.2$  Å) between the E2s epitope and the 8G12 Fab

| 8G12's epitope on E2s <sup>1</sup>        | 8G12 Fab residues         | Distance (Å) <sup>2</sup> |
|-------------------------------------------|---------------------------|---------------------------|
| Glu479 <sup>E2s(A)</sup> (OE1)            | Lys <sup>H63</sup> (NZ)   | 2.6                       |
| (OE1)                                     | Gln <sup>H60</sup> (OE1)  | 3.2                       |
| Arg542 <sup>E2s(B)</sup> (NH1)            | Gly <sup>H102</sup> (O)   | 3.0                       |
| Glu549 <sup>E2s(A)</sup> (OE1)            | Glu <sup>L93</sup> (OE1)  | 2.6                       |
| (OE1)                                     | Thr <sup>L94</sup> (N)    | 3.1                       |
| (OE2)                                     | Thr <sup>L94</sup> (OG1)  | 2.9                       |
| (OE2)                                     | Tyr <sup>H105</sup> (OH)  | 2.8                       |
| Gly551 <sup>E2s(A)</sup> (O)              | Gly <sup>H102</sup> (O)   | 3.0                       |
| (O)                                       | Asn <sup>H104</sup> (N)   | 2.9                       |
| Thr553 <sup>E2s(A)</sup> (N)              | Asn <sup>H104</sup> (OD1) | 2.7                       |
| (OG1)                                     | (OD1)                     | 3.2                       |
| (OG1)                                     | (ND2)                     | 3.0                       |
| Lys554 <sup>E2s(A)</sup> (NZ)             | Glu <sup>L93</sup> (OE1)  | 2.6                       |
| Thr564 <sup>E2s(B)</sup> (OG1)            | Trp <sup>L92</sup> (NE1)  | 2.8                       |
| Ser590 <sup>E2s(A)</sup> (N) <sup>3</sup> | Asp <sup>L1</sup> (OD1)   | 2.9                       |
| Gly591 <sup>E2s(A)</sup> (O)              | Gln <sup>H60</sup> (OE1)  | 2.7                       |
| Pro592 <sup>E2s(A)</sup> (O)              | Gln <sup>H58</sup> (N)    | 2.9                       |

<sup>1</sup> The residues are labeled to indicate their location on E2s dimer molecule (A or B)

<sup>2</sup> The calculation is based on the E2s<sup>HEV-4</sup>:8G12 Fab complex structure (2.3 Å resolution)

<sup>3</sup> For residue 590, a serine residue in genotype 4 but an alanine residue in the other genotypes
